# Supplementary material for: Adjustable structure transition and improved gases (H2, CO2) adsorption property of metal–organic framework MIL-53 by encapsulation of BNHx
Source: Royal Society of Chemistry journal article supplement (doi:10.1039/c2dt12463g), 2012-01-01
Supplement: c2dt12463g.pdf [file c2dt12463g.pdf]

**Modify structure transition and improve gas (H<sub>2</sub>, CO<sub>2</sub>)  
adsorption property of metal organic framework MIL-53 by  
encapsulation of BNH<sub>x</sub>**

**Xiaoliang Si, Jian Zhang, Fen Li, Chengli Jiao, Shuang Wang, Shuang Liu, Zhibao Li,  
Huaiying Zhou, Lixian Sun, Fen Xu.**

All reagents were obtained from commercial sources of analytical grade and used as received, unless otherwise noted.

## Materials Preparation

### Synthesis of MIL-53:

MIL-53(Al) was synthesized using terephthalic acid as a linker, following the protocol described in the literature.<sup>1</sup> In a typical experiment, a mixture of  $\text{Al}(\text{NO}_3)_3 \cdot 9\text{H}_2\text{O}$  (20 mmol) and  $\text{H}_2\text{BDC}$  (10 mmol) was suspended in water (30 mL) and heated at 220 °C for 3 days. After filtration, a white microcrystalline product was obtained. The as-synthesized sample was then heated at 430 °C for 5 days to remove the solvents and other guest molecules in the pores. The resulting void-cleaned sample was then stored in an Unilab91200 glove box (MBraun Co., Germany) filled with purified argon for further use.

### Synthesis of $\text{BNH}_x\text{@MIL-53}$ :

Boron and nitrogen resources are from ammonia borane. 0.2 g  $\text{NH}_3\text{BH}_3$  (97% Sigma-Aldrich) was dissolved in 10 ml THF (99.9% Acros), the resulting solution was transferred by syringe to a known mass of activated MIL-53. The mixture was stirred for one hour to allow the complete penetration of  $\text{NH}_3\text{BH}_3$  into the MIL-53 network, then the mixture was heated at 35 °C under vacuum condition for several hours. After vacuum treatment the product was heated to 450 °C for 8 h at a heating rate of 10 °C  $\text{min}^{-1}$  under Ar gas flow. Then the final product  $\text{BNH}_x\text{@MIL-53}$  was obtained. Boron content in nanocomposites was confirmed by elementary analysis.

### Low-pressure gas adsorption measurements

$\text{N}_2$  and  $\text{CO}_2$  adsorption and desorption isotherms were measured by Autosorb-1 system at 77 K and 273 K, respectively. All samples were firstly degassed at 200 °C for 6 hours.

Low pressure hydrogen adsorption tests were performed using the same Autosorb-1 system over a pressure range of 0-820 mmHg at 77 K with the universal Dewar filled with only liquid nitrogen. To obtain controllable temperatures such as 87 K for calculating the heats of  $\text{H}_2$  adsorption, a customized Optistat®DN cryostat was used, which has been developed specially for Autosorb-1 analyzers by Quantachrome Instruments, in cooperation with OXFORD Instruments (Abingdon, U.K.). The Cryostat Option (interfaced Autosorb-1, ITC503 and the OptistatDN Cryostat bath) allows one to run gas adsorption experiments over a wide range of controllable temperatures, from 77 K to 200 K, by using only liquid nitrogen as coolant. The isosteric heats ( $Q_{\text{st}}$ ) of hydrogen adsorption on the metal organic frameworks were calculated as a function of surface coverage, by the Clausius-Clapeyron equation:<sup>2</sup>

$$Q_{\text{st}} = -R \cdot d(\ln P) / d(1/T)$$

where  $R$  is the gas constant,  $T$  the temperature and  $P$  the gas pressure.

### **Other physical measurements**

Powder X-ray diffraction patterns (XRD) were collected in a X'Pert PRO X-ray diffractometer operating at 40 kV and 40 mA with a Cu K $\alpha$  radiation ( $\lambda=1.5418$  nm). FT-IR spectra were recorded on a Nicolet 380 infrared spectrometer using KBr pellets, in the 400-4000 cm<sup>-1</sup> frequency range. Elementary analysis were carried out on a 3520 ICP AES instrument (ARL Co., USA). <sup>11</sup>B magic-angle spinning (MAS) solid-state NMR experiments were conducted at room temperature on a Bruker Avance 500 NMR spectrometer and the <sup>11</sup>B NMR signals were referenced to BF<sub>3</sub> · Et<sub>2</sub>O at 0 ppm.

Before decomposition, the FTIR spectra of sample **1** and **2** demonstrate the existence of both MIL-53 and ammonia borane (**Fig. S1 a**). Peaks appear at 3290, 2340, 1170 and 1080  $\text{cm}^{-1}$  are belonging to ammonia borane. Peaks appear at 3290 and 2340  $\text{cm}^{-1}$  in ammonia borane are due to stretching of N-H and B-H bonds, respectively.

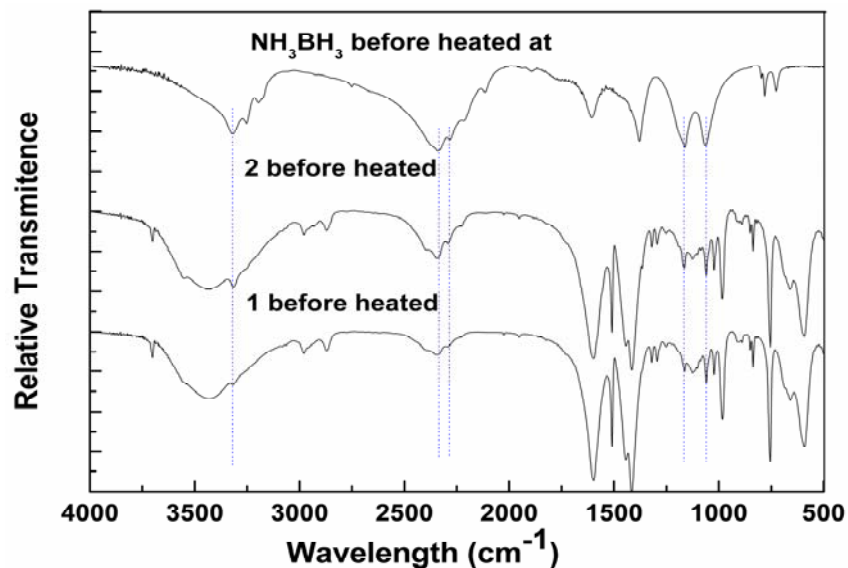

**Fig. S1 a.** FTIR characterization on all samples before heated at 450 °C for 8 hours..

After decomposition, no characteristic B-H stretch at 2300  $\text{cm}^{-1}$  was detectable, only weak N-H stretch can be detected at 3300  $\text{cm}^{-1}$ .

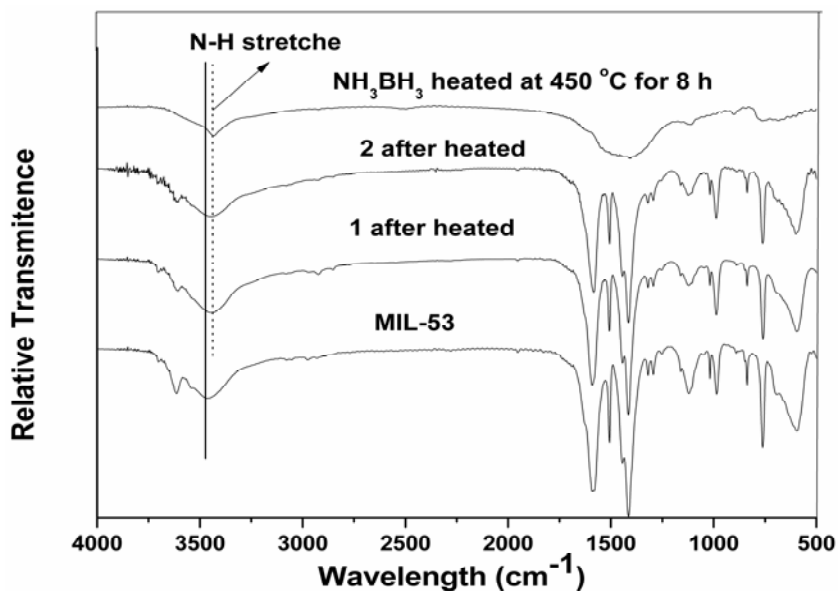

**Fig. S1 b.** FTIR characterization on all samples after heated at 450 °C for 8 hours..

**Fig. S2.**  $^{11}\text{B}$  solid-state NMR tests for sample **1** and **2**.

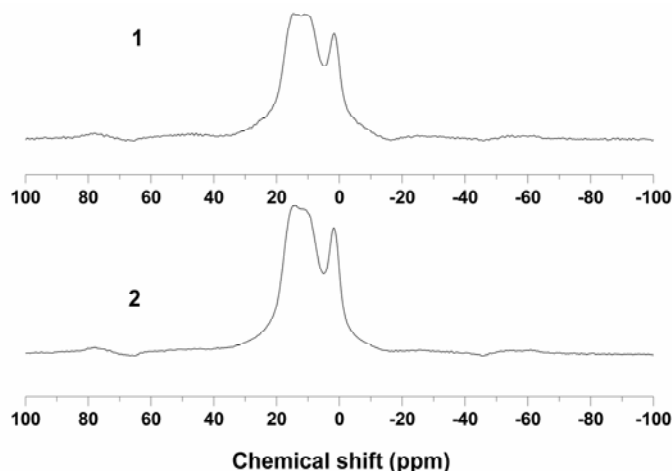

### Heat of Sorption Calculation for $\text{H}_2$ Uptakes

The enthalpy of  $\text{H}_2$  adsorption into the activated sample was calculated using a modified version of the Clausius-Clapeyron equation:

$$\ln\left(\frac{P_1}{P_2}\right) = \frac{H_{ads}}{R} \times \frac{T_2 - T_1}{T_1 \times T_2} \quad (\text{A})$$

( $T_i$  = temperature for isotherm  $i$ ;  $P_i$  = pressure for isotherm  $i$ ;  $R = 8.313 \text{ J K}^{-1} \text{ mol}^{-1}$ )

The pressure as a function of the amount of hydrogen adsorbed was determined using the Langmuir-Freundlich fit for the isotherms:

$$\frac{Q}{Q_m} = \frac{B \times P^{(1/t)}}{1 + B \times P^{(1/t)}} \quad (\text{B})$$

( $Q$  = moles adsorbed;  $Q_m$  = moles adsorbed at saturation;  $P$  = pressure;  $B$  and  $t$  = constants)

Equation B can be rearranged to 
$$P = \left( \frac{Q/Q_m}{B - B \times Q/Q_m} \right)^t$$

Heats of adsorption can be obtained by adding the P values derived from (B) into equation A.

**Fig. S3. (a)** H<sub>2</sub> adsorption isotherms for sample **1** at 77 k (black squares) Solid lines correspond to Langmuir-Freundlich fits to the experimental data.

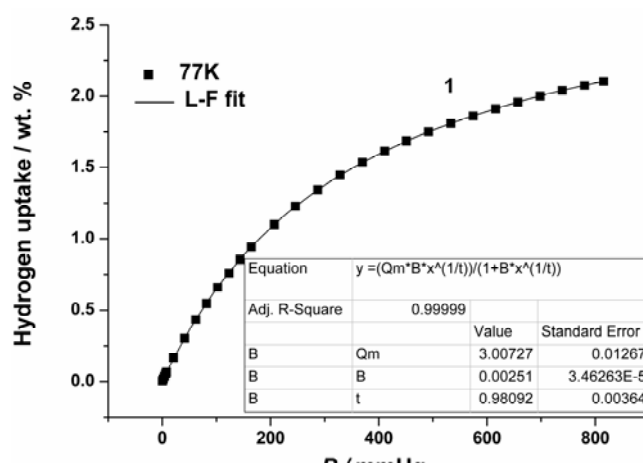

**(b)** H<sub>2</sub> adsorption isotherms for sample **1** at 87 k (black squares) Solid lines correspond to Langmuir-Freundlich fits to the experimental data.

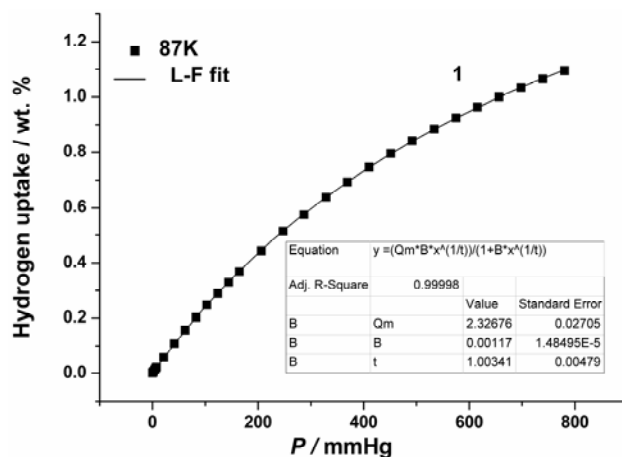

**Fig. S4. (a)** H<sub>2</sub> adsorption isotherms for sample 2 at 77 k (black squares) Solid lines correspond to Langmuir-Freundlich fits to the experimental data.

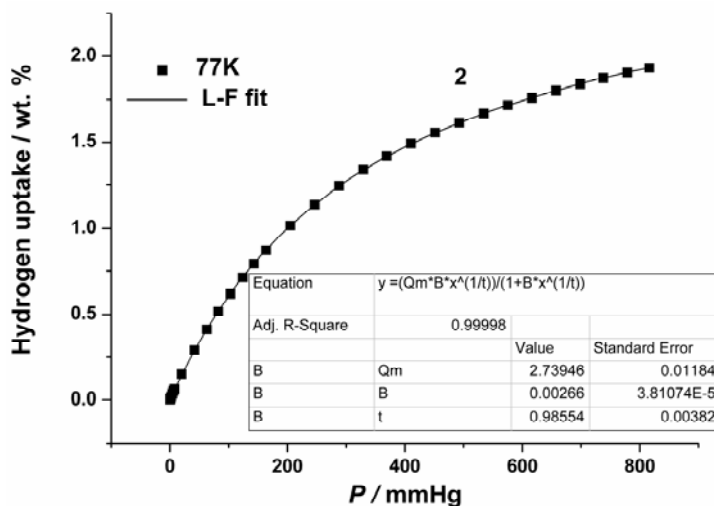

**(b)** H<sub>2</sub> adsorption isotherms for sample 2 at 87 k (black squares) Solid lines correspond to Langmuir-Freundlich fits to the experimental data.

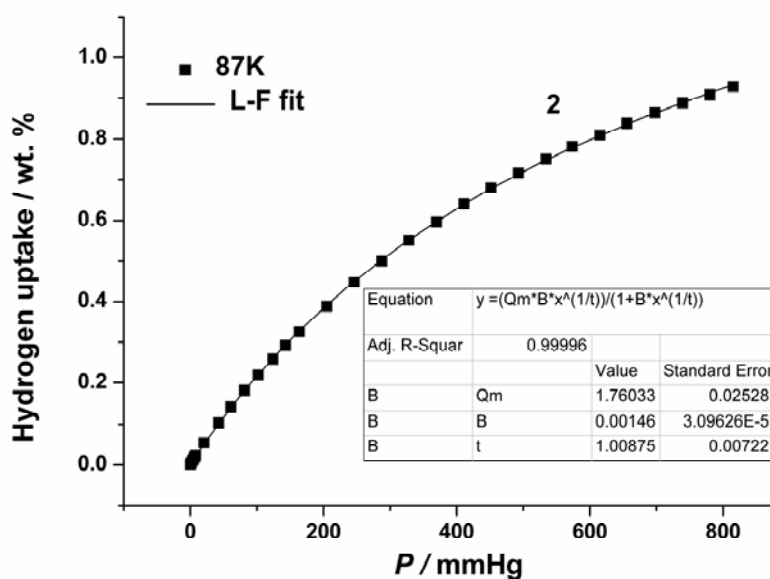

**Fig. S5. (a)** H<sub>2</sub> adsorption isotherms for sample **MIL-53** at 77 k (black squares) Solid lines correspond to Langmuir-Freundlich fits to the experimental data.

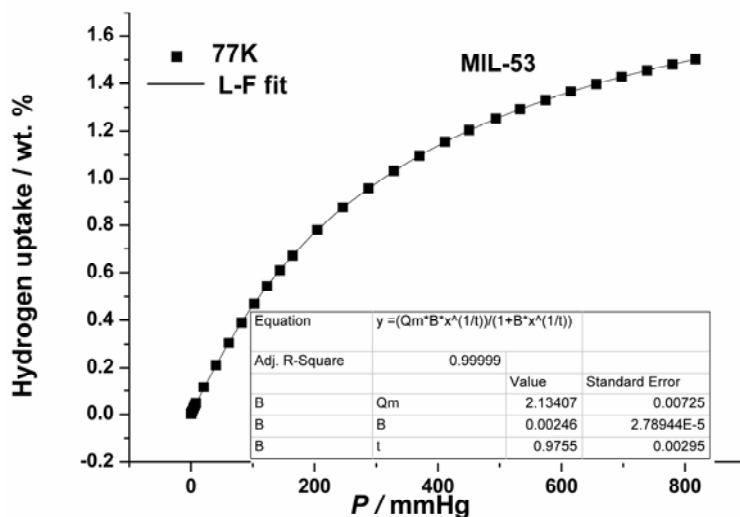

**(b)** H<sub>2</sub> adsorption isotherms for sample **MIL-53** at 87 k (black squares) Solid lines correspond to Langmuir-Freundlich fits to the experimental data.



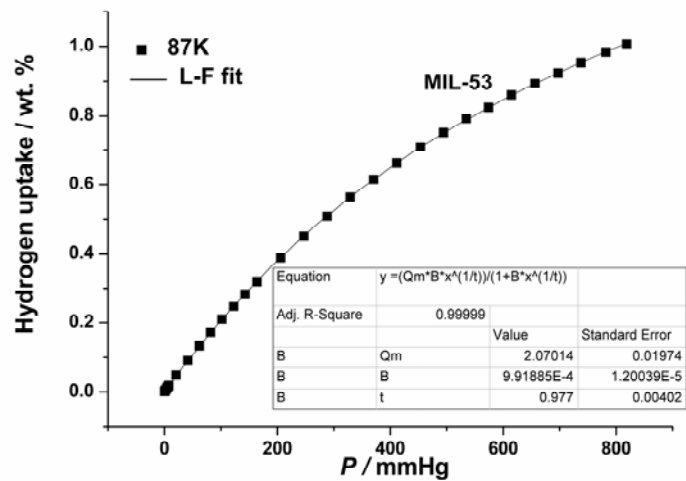

- 1 T. Loiseau, C. Serre, C. Huguenard, G. Fink, F. Taulelle, M. Henry, T. Bataille and G. Férey, *Chemistry-a European Journal*, 2004, **10**, 1373.
- 2 S. M. Cohen, Z. Q. Wang, K. K. Tanabe, *Chemistry-a European Journal* **2010**, *16*, 212.
